# Supplementary material for: Cold Stress, Freezing Adaptation, Varietal Susceptibility of Olea europaea L.: A Review
Source: MDPI journal article supplement (doi:10.3390/plants11101367), 2022-05-20
Supplement: s1 [file s1]

**Table S1.** List of the most relevant frosts in some olive growing areas.

| Year                | Temp. °C      | Cultivation area                                                                          | Source                                                                             |
|---------------------|---------------|-------------------------------------------------------------------------------------------|------------------------------------------------------------------------------------|
| 1216                |               | Lombardia, Tuscany, Italy:                                                                | Trinci 1763                                                                        |
| 1234                |               | Parma, Italy                                                                              | Fabbri 2017                                                                        |
| 1424-1431           |               | Veneto, Italy:                                                                            | Zorzi 2001                                                                         |
| 1432                |               | Pordenone, Italy:                                                                         | Zamparutti, 2004                                                                   |
| 1450                |               | Tuscany, Italy:                                                                           | Tavanti 1819                                                                       |
| 1455                |               | Tuscany, Italy:                                                                           | Baldini, 2003                                                                      |
| 1476-1480           |               | Tuscany, Italy:                                                                           | Tavanti 1819                                                                       |
| 1490                |               | Veneto Cividale-UD), Italy                                                                | Battigelli, 2002, Zorzi 2001                                                       |
| 1510                |               | Tuscany (FI), Italy                                                                       | Trinci 1763                                                                        |
| 1514                |               | Veneto Italy                                                                              | Zorzi 2001                                                                         |
| 1564                |               | Italy                                                                                     | Tavanti 1819                                                                       |
| 1568                |               | Umbria (Montefalco-PG), Italy                                                             | Panbuffetti 1956                                                                   |
| 1587                |               | Tuscany, Italy:                                                                           | Baldini, 2003                                                                      |
| 1600                |               | Tuscany, Italy:                                                                           | Presta, 1794; Trinci 1763                                                          |
| 1608                |               | Tuscany, Italy:                                                                           | Baldini, 2003, Tavanti 1819                                                        |
| 1610                |               | Tuscany, Italy:                                                                           | Tavanti 1819                                                                       |
| 1664                |               | Tuscany, Italy:                                                                           | Tavanti 1819                                                                       |
| 1709-               | -13°C         | Tuscany (PI, LI, GR); Lombardia (MN); Emilia (PR), Veneto, Italy; Perpignan-Nizza, France | Pellini, 1996, Morettini 1961, Mariti 1797, Caruso 1882, Pecori 1889, Presta 1794, |
| 1747-1770           |               | Tuscany, Italy:                                                                           | Morettini 1961, Tavanti 1819                                                       |
| 1749-55-60-66-67-68 |               | Tuscany, Veneto, Italy                                                                    | Tavanti 1819, Zorzi 2001                                                           |
| 1782                |               | Greece                                                                                    | Xoplaki et al., 2001                                                               |
| 1788-89             |               | Tuscany, Veneto, Italy                                                                    | Presta 1794, Giovine 1788, Morettini 1961, Zorzi 2001                              |
| 1807/08             |               | Greece                                                                                    | Xoplaki et al., 2001                                                               |
| 1794-1812-1816      |               | Veneto, Italy                                                                             | Zorzi 2001                                                                         |
| 1846-47             | -13°C         | Tuscany, Italy                                                                            | Ridolfi, 1847; Cuppari 1848, Pecori 1889                                           |
| 1849                | -20°C         | Tuscany, Italy                                                                            | Caruso 1882, Pecori 1889                                                           |
| 1855                | -18°C         | Montpellier, France                                                                       | Martins in Pecori 1889                                                             |
| 1870                | -15/16°C      | Montpellier, Nemes, France                                                                | Martins in Pecori 1889                                                             |
| 1871-72             | -11°C         | Tuscany, Italy                                                                            | Presta 1794, Caruso 1882, Pecori 1889                                              |
| 1893                | -11°C         | Tuscany, Italy                                                                            | Morettini 1961                                                                     |
| 1895                | -10.6°C       | Tuscany, Italy                                                                            | Morettini 1961                                                                     |
| 1907                | -11.7°C       | Tuscany, Italy                                                                            | Morettini 1961                                                                     |
| 1929-'30            | -22°C         | Tuscany, Umbria Italy                                                                     | Brunetti, 2001, Morettini 1961                                                     |
| 1939-40             | -15°C         | Tuscany, Italy                                                                            | Breviglieri 1940                                                                   |
| 1956                | -20.1°C       | Tuscany, Umbria, Italy:                                                                   | Scaramuzzi Andreucci 1957, Morettini 1961, Morettini Marinucci Jacoponi 1956       |
| 1967/8              | -10.4°C       | Umbria, Italy                                                                             | Fontanazza, Preziosi, 1967                                                         |
| 1983-1985-1987      |               | Turkey                                                                                    | Ozturk et al., 2021                                                                |
| 1985-               | -23°C         | Tuscany, Italy                                                                            | Scaramuzzi et al 1989                                                              |
| 1990                | -9.4/-22.8 °C | California, USA                                                                           | Denney et al., 1993                                                                |
| 1991/1992           |               | Crete, Greece                                                                             | Xoplaki et al., 2001                                                               |
| 2000/2005/2007/2008 |               | Saudi Arabia                                                                              | Naser et al., 2018                                                                 |

|             |            |                                      |                         |
|-------------|------------|--------------------------------------|-------------------------|
| <b>2010</b> | -1.7/-5°C  | New South Wales, Victoria, Australia | Sergeeva, 2010          |
| <b>2012</b> | -4.7/6.4°C | Marche, Italy                        | Lodolini et al, 2016    |
| <b>2016</b> | -15°C      | Golestan Iran                        | Karamatlou et al., 2019 |
| <b>2018</b> | 4/-6°C     | Apulia, Italy                        | Paradiso, 2018          |

### Supplementary 1 References

- Baldini, E.. *Notizie sull'olivicultura Bolognese*. Ed. Accademia Nazionale di Ggricoltura. Bologna, Italy, 2003.
- Breviglieri, N. Osservazioni sui danni causati all'Olivio dalle basse temperature dell'inverno 1939-40 nel Mugello. *L'Olivicoltore* **1940**, Roma, Italy.
- Caruso, G. Monografia dell'olivo. In *Enciclopedia Agraria Italiana*. UTET Ed., Torino, Italy, 1882; Volume 3 (5), pp. 501-533
- Cuppari, P. Alcune osservazioni intorno agli effetti del gelo sugli olivi. *Bullettino agrario*, , **1848**. 5,XXII.
- Denney, J.O.; McEachern, G.R. 1983. An analysis of several climatic temperature variables dealing with olive reproduction. *J. Amer. Soc. Hort. Sci.* **1983**, 108, 578-581
- Fabbri, A. The olive in Northern Italy. A Mediterranean tale. *Rivista di Storia dell'Agricoltura* 2017, LVII (1) 1-32.
- Francolini, F. *Olivicoltura*. Un. Tip. Ed. Torinese, Torino, Italy, 1923.
- Fontanazza G.; Preziosi P. L'olivo e le basse temperature. Osservazioni su 37 cultivar da olio e 20 cultivar da mensa. *L'Italia Agricola* **1969**, 7-8, 737-745.
- Gaetani, L. I danni del gelo degli olivi nel 1929 in Umbria. *La Metereologia pratica* **1938**
- Giovine G.M., 1788. Relazione del danno cagionato agli olivi della campagna di Molfetta dalla gelata del 30-31 dicembre 1788. Ed. *Opere*, vol II.
- Denney, J.O. AccoFding to NCDC records, serious freezes in which temperatures dipped below 20°F (-6.7°C) occurred at several sites in 1913,1919, 1930,1932,1937,1948,1949,1950,1972, and 1978. Of the freezes before 1990, the 1913 and 1932 freezes were the most severe and extensive
- Lodolini, E.M.; Alfei, B.; Santinelli, A.; Cioccolanti, T.; Polverigiani, S; Neri, D. Frost tolerance of 24 olive cultivars and subsequent vegetativere-sprouting as indication of recovery ability. *Sci Hort* 2016, 211 (1), 152-157. <https://doi.org/10.1016/j.scienta.2016.08.025>
- Karamatlou, I.; Navabpour, S.; Zainilnejad, Kh.; Tavakol, E.; Hosseini Mazinani, M. Morphological Evaluation and Selection of Tolerant Trees to Freezing Stress at the Olive Orchards in Golestan Province. *Journal of Horticultural Science* **2019** 33, 287-299. ISSN: 2008 - 4730
- Mariti, G. *L'Odeporico, ossia Itinerario per le colline pisane*, Firenze 1797, pp.. 54.
- Morettini, A. Sulla ricostruzione degli olivi daneggiati dalle basse temperature del 1956. In *Ricostruzione degli olivi danneggiati dal freddo*. Accademia dei Georgofili Ed.; Firenze, Italy, 1989; Volume 2, pp. 1-42.
- Morettini, A; Marinucci, M.; Jacoboni, N. Olivi colpiti dal gelo. REDA Ed., Roms, Italy, 1965; pp. 69.
- Naser, I.; Hermogino, R.; Angeles, C.; Abu Kashem A. Effect of frost and salts dissolved after heavy rain on the productivity of olive trees under desert growing conditions. *Journal of Agriculture and Allied Sciences* **2018**, RRJAAS| 7 (1), 85-103.
- Panbuffetti, P. 1956. Ieri come oggi. La galaverna del. *Agricoltore* **1568**, n. 15.
- Pellini, U. *Alberi nella storia di Reggio*. AGE Ed.Reggio Emilia, Italy, 1996.
- Ozturk, M.; Altay, V.; Gönenç, T.M.; Unal, B.T.; Efe, R.; Akçiçek, E.; Bukhari, A. An Overview of Olive Cultivation in Turkey: Botanical Features, Eco-Physiology and Phytochemical Aspects. *Agronomy* **2021**, 11, 295. <https://doi.org/10.3390/agronomy11020295>
- Paradiso, N. Attenzione ai danni da gelo su olivo in Puglia. *L'Informatore Agrario* **2018**, 16, 74-75.
- Pecori, R.. *La coltura dell'olivo in Italia* Ricci M Ed.; Florence, Italy, 1889; pp. 428. .
- Presta, G. 1786. Memoria su i saggi diversi di olio e su della ragia di ulivo della penisola salentina. In *Memoria intorno a sessantadue saggi diversi di olio*, 1nd ed.; GS Romano Ed. Lecce Italy, 1786; Volume I, pp. 1-42.
- Presta, G. *Degli ulivi, delle ulive e della maniera di cavar l'olio*. Stamperia Reale, Ed.a Italy, 1794; Volume II pp. 619
- Ridolfi, C. Del danno provato dagli olivi pel gelo del dicembre 1846. *Giornale Agrario Toscano* **1847**, XXI, 71-731847

- Scaramuzzi, F.; Andreucci, E. Indagini e osservazioni sui danni provocati dalle minime termiche del febbraio 1956 agli olivi nei vivai di Pescia. *Nuovo Giornale Botanico Italiano* 1957, 64, 19-104.
- Scaramuzzi, F.; Andreucci, E. Indagini e osservazioni sui danni provocati dalle minime termiche del febbraio 1956 agli olivi nei vivai di Pescia. *Nuovo Giorn. Bot. It.*, **1957**, 66(1-2): 19-124.
- Sergeeva, V. Frost and chilling injuries in olive. Australian and New Zealand. *Olive grower and Processor* **2010**, 74, 23-34.
- Tavanti, G. . *Trattato Teorico-Pratico Completo Sull'Ulivo*. Piatti Ed. Firenze, Italy; 1819; pp. 259, Italy.
- Trinci, C. 1763. Trattato degli Ulivi. In *L'Agricoltore sperimentato, ovvero Regole Generali sopra l'agricoltura*, 7<sup>nd</sup> G. Dorigoni Ed.; Venezia, Italy, 1763, Volume 1, pp. 526
- Xoplaki, E.; Panagiotis Maheras, P; Juerg Luterbacher, J. Variability of climate in meridional balkans During the periods 1675–1715 and 1780–1830 And its impact on human life. *Climatic Change* **2001**, 48, 581–615
- Zamparotti, P. 2004 L'inverno più freddo degli ultimi 500 anni. *Meteo Clima e Storia* **2004**.
- Zorzi A. 2001. La Repubblica del Leone. Bompiani Ed. pp. 766. Italy
